# Supplementary material
Source: PubMed Central journal article supplement (PMC7810220)
Supplement: NIHMS1658484-supplement-supplementary_information.pdf [file NIHMS1658484-supplement-supplementary_information.pdf]

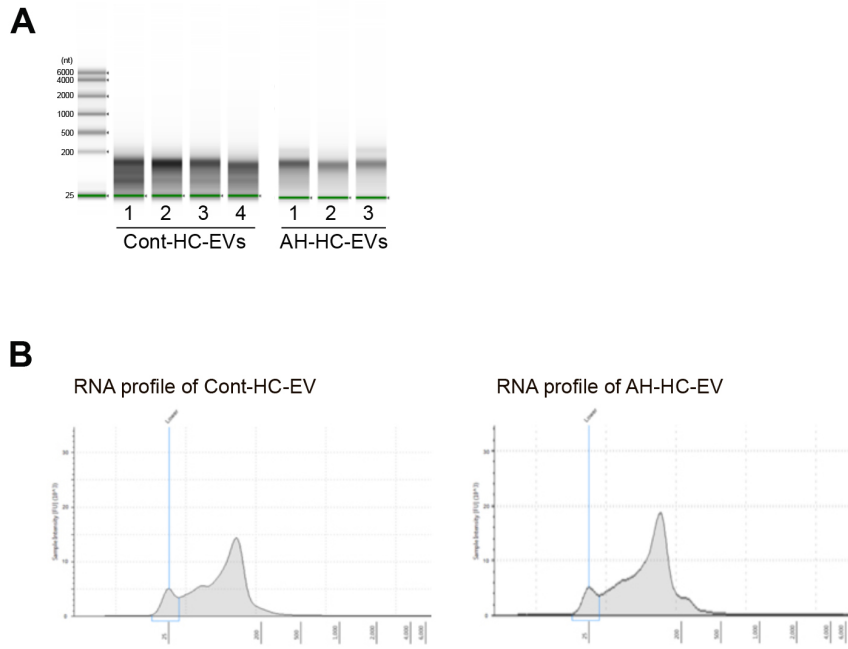

Supplementary Figure 1. Hepatocyte-derived EV characterization.  
(A) Gel electrophoresis of isolated RNAs.  
(B) Characterization of the miRNAs encapsulated in the HC-EVs by Agilent 2100 Bioanalyzer. Cont, control and AH, alcoholic hepatitis.

Supplementary Table 1

| id                           | baseMean   | group_CTL_r | group_mAH_FC | mAH_ov    | log2FoldChange | pval      |
|------------------------------|------------|-------------|--------------|-----------|----------------|-----------|
| mmu-miR-181a-5p_MIMAT0000210 | 31.1455683 | 15.3484906  | 52.2083387   | 3.4015292 | 1.7661835      | 8.00E-07  |
| mmu-let-7a-5p_MIMAT0000521   | 69.7692218 | 24.4310243  | 130.220152   | 5.3301143 | 2.4141665      | 2.50E-06  |
| mmu-let-7i-5p_MIMAT0000122   | 31.5693465 | 16.6972047  | 51.398869    | 3.0782918 | 1.62213        | 4.70E-06  |
| mmu-let-7f-5p_MIMAT0000525   | 189.381259 | 89.4350055  | 322.64293    | 3.6075687 | 1.8510269      | 4.80E-06  |
| mmu-miR-125a-5p_MIMAT0000135 | 13.4938371 | 7.0188188   | 22.1271948   | 3.1525525 | 1.6565204      | 1.19E-05  |
| mmu-miR-221-3p_MIMAT0000669  | 11.8325825 | 6.5576111   | 18.8658779   | 2.8769437 | 1.524537       | 9.39E-05  |
| mmu-miR-126a-3p_MIMAT0000138 | 23.6501018 | 14.005787   | 36.5091881   | 2.6067216 | 1.3822365      | 0.0001333 |
| mmu-miR-103-3p_MIMAT0000546  | 16.189302  | 9.2413737   | 25.4532065   | 2.7542666 | 1.4616682      | 0.0001557 |
| mmu-miR-27a-3p_MIMAT0000537  | 11.7212802 | 7.4498106   | 17.4165731   | 2.3378545 | 1.2251851      | 0.0002541 |
| mmu-miR-99b-5p_MIMAT0000132  | 62.0469597 | 41.9318992  | 88.8670405   | 2.1193183 | 1.0836003      | 0.000504  |
| mmu-miR-19b-3p_MIMAT0000513  | 46.375689  | 63.7481487  | 23.2124094   | 0.3641268 | -1.4574872     | 0.0012047 |
| mmu-miR-25-3p_MIMAT0000652   | 14.3233264 | 10.3724089  | 19.5912163   | 1.8887817 | 0.917456       | 0.0035274 |
| mmu-miR-101b-3p_MIMAT0000616 | 33.4797223 | 43.8778867  | 19.615503    | 0.4470476 | -1.1614997     | 0.0038982 |
| mmu-miR-146a-5p_MIMAT0000158 | 10.6807392 | 7.2604793   | 15.2410856   | 2.0991845 | 1.069829       | 0.0061205 |
| mmu-miR-10a-5p_MIMAT0000648  | 232.535666 | 167.000082  | 319.916445   | 1.9156664 | 0.9378463      | 0.0064862 |
| mmu-miR-148b-3p_MIMAT0000580 | 9.4100287  | 6.4525496   | 13.3533343   | 2.0694664 | 1.0492588      | 0.006689  |
| mmu-miR-125b-5p_MIMAT0000136 | 11.1635423 | 7.4498749   | 16.1150988   | 2.1631368 | 1.1131249      | 0.0077759 |
| mmu-miR-100-5p_MIMAT0000655  | 18.2766589 | 13.184313   | 25.0664533   | 1.9012332 | 0.9269355      | 0.0081653 |
| mmu-miR-151-3p_MIMAT0000161  | 11.4221039 | 8.514435    | 15.2989959   | 1.7968304 | 0.8454543      | 0.0151641 |
| mmu-miR-193a-3p_MIMAT0000223 | 11.6563745 | 14.852966   | 7.3942524    | 0.49783   | -1.0062749     | 0.0276435 |
| mmu-miR-107-3p_MIMAT0000647  | 10.2738941 | 7.2326588   | 14.3288746   | 1.9811351 | 0.9863273      | 0.027879  |
| mmu-miR-199b-3p_MIMAT0004667 | 7.7612192  | 5.7747814   | 10.4098029   | 1.8026315 | 0.8501045      | 0.0427204 |
| mmu-miR-152-3p_MIMAT0000162  | 7.3376545  | 5.5975846   | 9.6577477    | 1.725342  | 0.7868824      | 0.0457862 |
| mmu-miR-192-5p_MIMAT0000517  | 2615.15456 | 3204.03686  | 1829.97817   | 0.5711477 | -0.8080643     | 0.0482257 |

Supplementary Table 2

normalized

| id                            | MAH_1       | MAH_3      | MAH_4      | CTL_1      | CTL_2      | CTL_3      | CTL_4      | row_sum     |
|-------------------------------|-------------|------------|------------|------------|------------|------------|------------|-------------|
| mmu-nrlf-181a-5p_MIMAT0000210 | 48.0802907  | 66.5892954 | 40.2692789 | 16.5851054 | 12.3544753 | 20.5300172 | 11.675006  | 216.083469  |
| mmu-let-7a-5p_MIMAT0000521    | 82.6274926  | 157.493171 | 149.083874 | 24.0412848 | 30.6323291 | 27.115751  | 16.257034  | 487.250936  |
| mmu-let-7f-5p_MIMAT0000122    | 49.8174574  | 64.5152749 | 39.9191133 | 16.5317199 | 15.6884912 | 21.7732424 | 13.9293653 | 222.174661  |
| mmu-let-7f-5p_MIMAT0000525    | 234.489483  | 377.471725 | 363.211388 | 100.400392 | 104.065299 | 100.566844 | 56.0290317 | 1336.23416  |
| mmu-nrlf-125a-5p_MIMAT0000135 | 20.0614733  | 67.9672619 | 19.5218461 | 4.5555654  | 8.7361675  | 6.341526   | 94.9454547 |             |
| mmu-nrlf-221-3p_MIMAT0000669  | 22.3590163  | 14.3857559 | 20.8349747 | 8.3993238  | 7.17575    | 3.9648806  | 6.9463536  | 84.0466058  |
| mmu-nrlf-126a-3p_MIMAT0000138 | 38.3857799  | 33.8462596 | 36.0672672 | 9.2001068  | 11.8129092 | 17.2035496 | 16.9168454 | 163.432707  |
| mmu-nrlf-103-3p_MIMAT0000546  | 26.0575002  | 26.7452475 | 21.2726843 | 7.4561794  | 9.2066227  | 7.2913482  | 5.7916827  | 97.4853904  |
| mmu-nrlf-27a-3p_MIMAT0000537  | 21.1261883  | 19.7698866 | 13.112866  | 6.3528784  | 6.2110855  | 8.8033789  | 8.6142116  | 84.0084159  |
| mmu-nrlf-99b-5p_MIMAT0000132  | 104.286039  | 95.5373257 | 63.5554272 | 43.0821247 | 31.0046558 | 58.8683962 | 32.9095977 | 429.324566  |
| mmu-nrlf-19b-3p_MIMAT0000513  | 26.7859895  | 24.9765018 | 19.3467623 | 9.39407421 | 57.4229242 | 47.2089593 | 61.5467928 | 331.227672  |
| mmu-nrlf-25-3p_MIMAT0000652   | 26.0575002  | 19.0633371 | 12.5184932 | 9.3068778  | 11.7521374 | 8.5009727  | 11.4367405 | 98.64660589 |
| mmu-nrlf-101b-3p_MIMAT0000616 | 22.1909034  | 16.0626266 | 20.0470975 | 46.2318712 | 45.0884489 | 37.4311606 | 45.6369935 | 232.669102  |
| mmu-nrlf-146a-5p_MIMAT0000158 | 13.196863   | 16.9893166 | 16.3703373 | 6.317288   | 6.1941616  | 9.9794028  | 7.3129158  | 76.3602851  |
| mmu-nrlf-10a-5p_MIMAT0000648  | 288.313631  | 415.201246 | 253.171206 | 147.82454  | 118.992213 | 215.817185 | 185.278862 | 1624.598888 |
| mmu-nrlf-148b-3p_MIMAT0000580 | 12.6346867  | 14.7829118 | 13.74408   | 7.7409022  | 7.5650006  | 7.9297611  | 5.2051832  | 69.6043256  |
| mmu-nrlf-125b-5p_MIMAT0000136 | 13.4770512  | 17.2099571 | 16.9831307 | 4.1996619  | 10.7974729 | 7.5601536  | 7.4961969  | 77.7236243  |
| mmu-nrlf-151-3p_MIMAT0000161  | 17.0074222  | 15.4889614 | 13.0437447 | 8.6128659  | 8.021947   | 8.7697782  | 8.9624457  | 79.9071651  |
| mmu-nrlf-193a-3p_MIMAT0000223 | 7.7051748   | 5.4277557  | 8.6666492  | 18.6137557 | 12.3544753 | 8.2993686  | 19.8859992 | 80.9531785  |
| mmu-nrlf-107-3p_MIMAT0000647  | 14.7098792  | 17.4039575 | 17.7710079 | 9.8941187  | 9.8665653  | 6.88814    | 8.8891333  | 85.4495329  |
| mmu-nrlf-199b-3p_MIMAT0000467 | 1.9332984   | 2.6035576  | 1.3131287  | 0.800783   | 0.5923379  | 1.0416212  | 0.9713898  | 9.2561166   |
| mmu-nrlf-152-3p_MIMAT0000162  | 8.741871    | 10.8118833 | 9.1919006  | 6.1215411  | 5.787987   | 6.0817236  | 4.6553399  | 51.3917465  |
| mmu-nrlf-192-5p_MIMAT0000517  | 207.52569   | 1673.38149 | 1706.45447 | 3414.66323 | 3163.15185 | 2802.12894 | 3270.85281 | 18058.1585  |
|                               | log 2       |            |            |            |            |            |            |             |
| mmu-nrlf-181a-5p_MIMAT0000210 | MAH_1       | MAH_3      | MAH_4      | CTL_1      | CTL_2      | CTL_3      | CTL_4      |             |
| mmu-let-7a-5p_MIMAT0000521    | 5.58737371  | 6.05721837 | 5.33160773 | 4.05181628 | 3.62696183 | 4.35966293 | 3.54535139 |             |
| mmu-let-7f-5p_MIMAT0000122    | 6.36854998  | 7.29914547 | 7.2199804  | 4.58744209 | 4.93698316 | 4.76105922 | 4.02299211 |             |
| mmu-let-7f-5p_MIMAT0000525    | 5.63857949  | 6.01156887 | 5.3190077  | 4.04776492 | 3.97163471 | 4.44448436 | 3.80005743 |             |
| mmu-nrlf-125a-5p_MIMAT0000135 | 7.87373941  | 8.56024777 | 8.50466562 | 6.64962108 | 6.70134527 | 6.65201092 | 5.80810265 |             |
| mmu-nrlf-221-3p_MIMAT0000669  | 4.32635566  | 4.75286985 | 4.28701758 | 2.18763012 | 3.13201747 | 3.12700217 | 2.66483005 |             |
| mmu-nrlf-126a-3p_MIMAT0000138 | 4.48278481  | 3.84659649 | 4.38093544 | 3.07027319 | 2.84312963 | 1.98727742 | 2.79625585 |             |
| mmu-nrlf-103-3p_MIMAT0000546  | 5.26250006  | 5.08092405 | 5.17261821 | 3.20165061 | 3.5622924  | 4.10463436 | 4.08038866 |             |
| mmu-nrlf-27a-3p_MIMAT0000537  | 4.30191715  | 4.74101526 | 4.41093019 | 2.89843657 | 3.20267202 | 2.8661856  | 2.53998257 |             |
| mmu-nrlf-99b-5p_MIMAT0000132  | 4.74340669  | 4.64249952 | 4.27402025 | 5.98994342 | 5.4290175  | 4.95441297 | 5.87942142 | 5.04398301  |
| mmu-nrlf-19b-3p_MIMAT0000513  | 6.70440222  | 6.57799259 | 5.98994342 | 5.4290175  | 5.87942142 | 5.04398301 | 5.04398301 |             |
| mmu-nrlf-25-3p_MIMAT0000652   | 4.70362678  | 4.25272878 | 3.64598902 | 3.21829726 | 3.55607834 | 3.08762793 | 3.51560403 |             |
| mmu-nrlf-101b-3p_MIMAT0000161 | 4.4718965   | 4.00565392 | 4.32532147 | 5.53081585 | 5.49404589 | 5.2816788  | 5.51213185 |             |
| mmu-nrlf-146a-5p_MIMAT0000158 | 3.72212313  | 4.08655592 | 4.03301214 | 2.65090535 | 2.63090902 | 3.31895348 | 2.87044675 |             |
| mmu-nrlf-10a-5p_MIMAT0000648  | 8.17149524  | 8.69766696 | 7.98396952 | 7.20774197 | 6.89472336 | 7.53366594 | 7.53355449 |             |
| mmu-nrlf-148b-3p_MIMAT0000580 | 3.6595235   | 3.88585856 | 3.78073843 | 2.95250172 | 2.9193402  | 2.9872774  | 2.37994894 |             |
| mmu-nrlf-125b-5p_MIMAT0000136 | 3.75243296  | 4.10511716 | 4.08603053 | 2.07077319 | 3.43262179 | 2.91841555 | 2.90611885 |             |
| mmu-nrlf-100-5p_MIMAT0000655  | 4.51849691  | 4.97964071 | 4.31266617 | 3.5948979  | 4.0234976  | 3.74787121 | 3.74787121 |             |
| mmu-nrlf-151-3p_MIMAT0000161  | 4.08809258  | 3.9531685  | 3.7052862  | 3.10649337 | 3.00395243 | 3.13254036 | 3.16389247 |             |
| mmu-nrlf-193a-3p_MIMAT0000223 | 2.94582769  | 2.44035579 | 3.11547431 | 4.21829727 | 3.62696183 | 3.05300158 | 4.31368115 |             |
| mmu-nrlf-107-3p_MIMAT0000647  | 3.87871349  | 4.12355012 | 4.1514536  | 3.3065121  | 3.30256125 | 2.78411447 | 3.15204276 |             |
| mmu-nrlf-199b-3p_MIMAT0000467 | 0.95106433  | 1.38048432 | 0.39300832 | -0.3205167 | -0.7550771 | 0.05883072 | -0.0418778 |             |
| mmu-nrlf-152-3p_MIMAT0000162  | 3.12794209  | 3.43447922 | 3.2003632  | 2.6138949  | 2.53306168 | 2.60448025 | 2.21888651 |             |
| mmu-nrlf-192-5p_MIMAT0000517  | 10.98555045 | 10.7085507 | 10.7367862 | 11.6271471 | 11.4523076 | 11.6754511 | 11.6754511 |             |
